# Supplementary material for: Bio-based graphene/sodium alginate aerogels for strain sensors
Source: Royal Society of Chemistry journal article supplement (doi:10.1039/c6ra12469k), 2016-01-01
Supplement: c6ra12469k1.pdf [file c6ra12469k1.pdf]

## APPENDIX A: SUPPLEMENTARY DATA

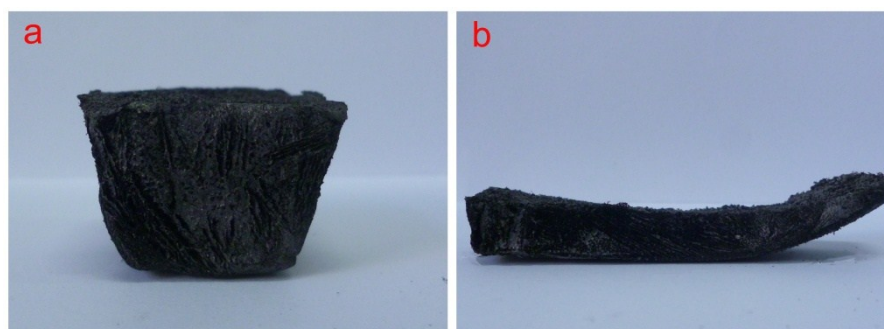

Fig. S1. Photographs of different shapes of aerogels (a) cube (b) ribbon

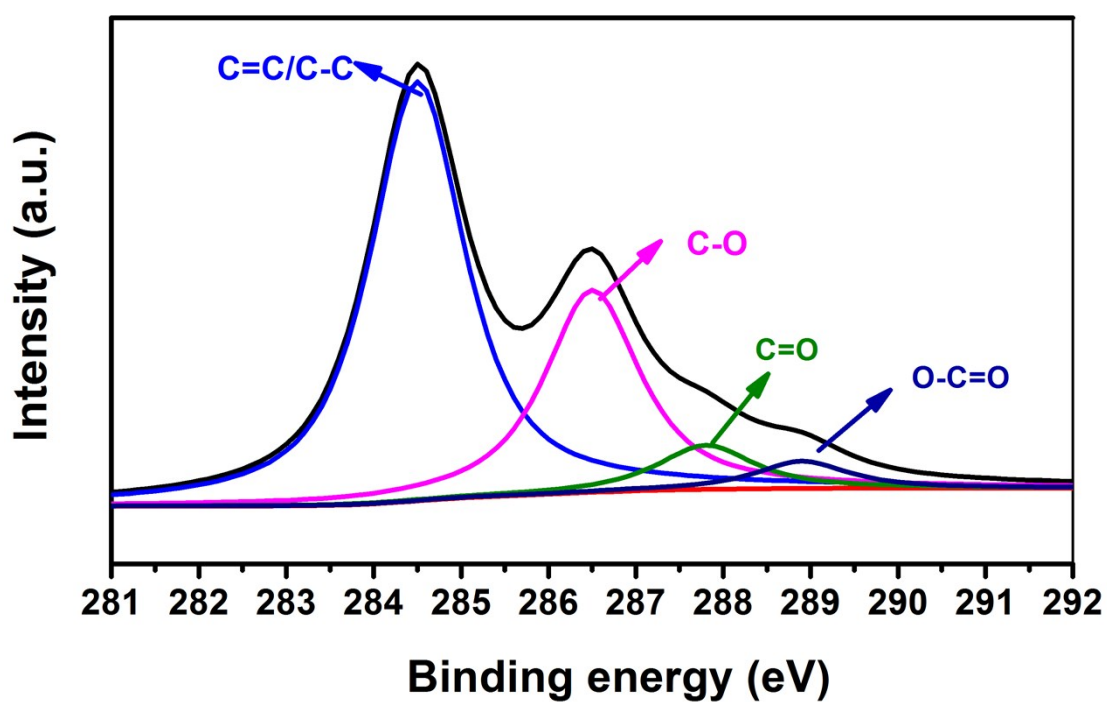

Fig. S2. XPS spectra of GO

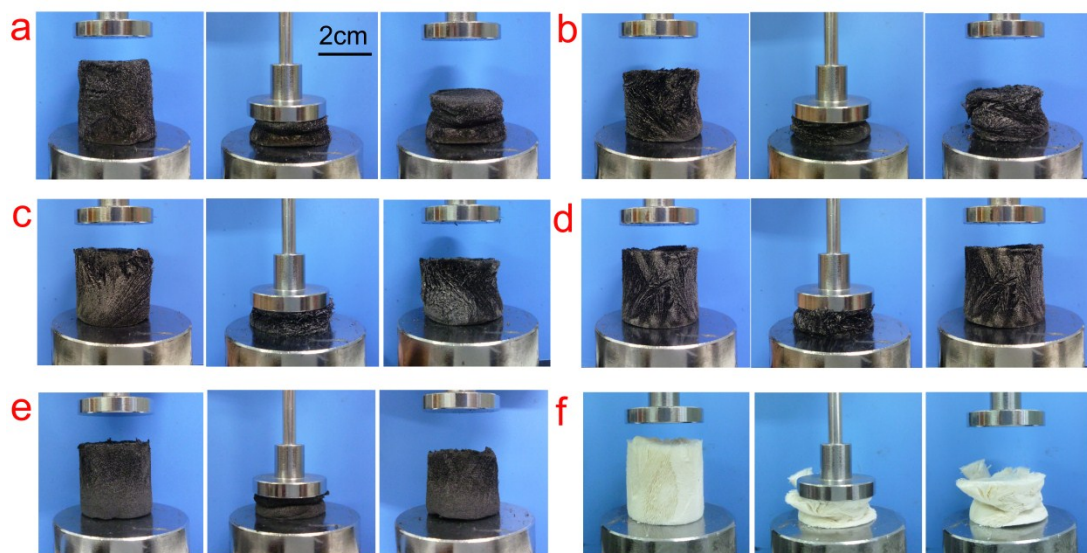

**Fig. S3.** Photographs showing different aerogels under a compressing and releasing cycle. (a) pure-GO aerogel (b-e) rGO/SA-1, rGO/SA-2, rGO/SA-3 and rGO/SA-4 aerogels (f) pure-SA aerogel.

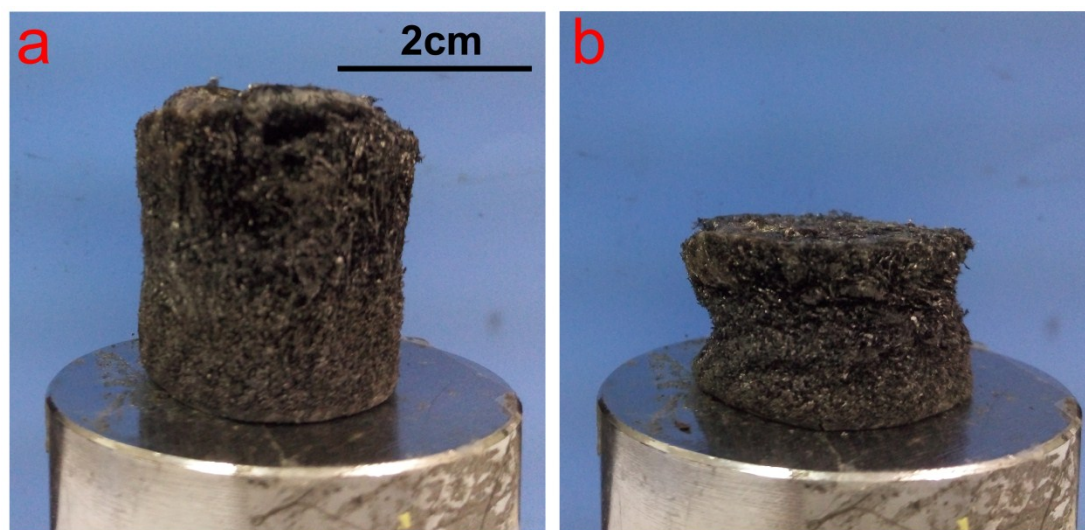

**Fig. S4.** Photographs of pure-rGO aerogel before (a) and after (b) 10 compression cycles at 50% strain
